# Supplementary material for: Bilirubin ameliorates murine atherosclerosis through inhibiting cholesterol synthesis and reshaping the immune system
Source: Springer Nature journal article supplement (doi:10.1186/s12967-021-03207-4), 2022-01-03
Supplement: MOESM1 [file 19991638]

## Supplementary material

### Supplementary Figures

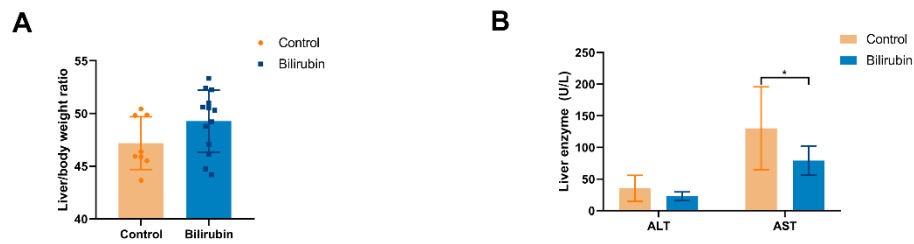

**Figure S1.** (A) ApoE<sup>-/-</sup> mice fed with a western-type diet were intraperitoneally injected with or without bilirubin. After ten weeks, mice were scarified, and the body and liver weight were measured. The relative liver weight was expressed as liver weight to body weight ratio. (B) Concentrations of liver enzymes were determined by biochemical analysis. Error bars represent mean  $\pm$  SD. n (control) =8, n (bilirubin) =14. \* $P < 0.05$ . Differences were determined by an unpaired t-test.

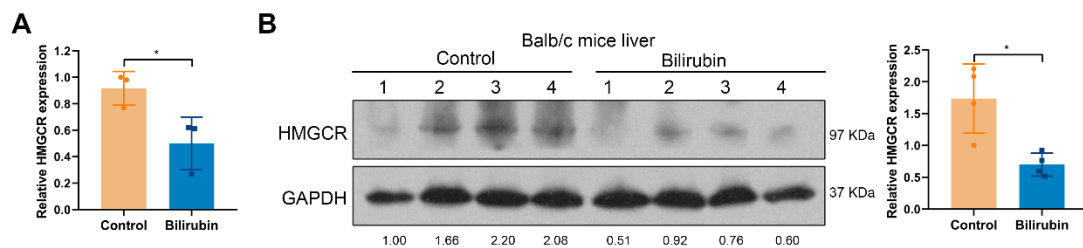

**Figure S2.** (A) Quantification of hepatic HMGCR protein expression in ApoE<sup>-/-</sup> mice treated with bilirubin (n=3) or vehicle (control, n=3). (B) BALB/c mice were received intraperitoneal injection of bilirubin (20 mg/Kg/day, n=4) or vehicle (n=4) once a day for 3 days and sacrificed at day 4. The expression levels of HMGCR in the livers were determined by western blot. Bar plots showing the relative HMGCR protein expression in the livers (right panel). \* $P < 0.05$ .

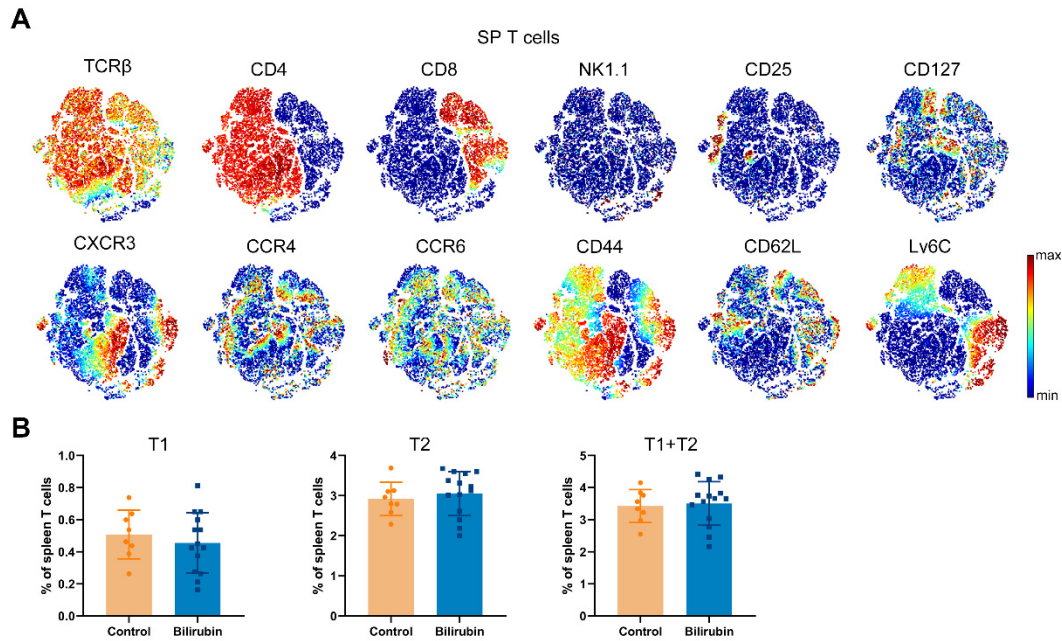

**Figure S3.** After determining the expression of 27 surface markers on the spleen cells using mass cytometry, the T cells expressing CD3 were gated and analyzed using viSNE. viSNE was used to visualize the distribution of the spleen T cells from both groups. Cells on the viSNE map were colored by normalized expression of indicated surface markers. **(B)** Bar plots showing the frequencies of T1 or T2 in spleen T cells obtained from ApoE<sup>-/-</sup> mice treated with or without bilirubin. Error bars represent mean  $\pm$  SD. n (control) = 8, n (bilirubin) = 14.

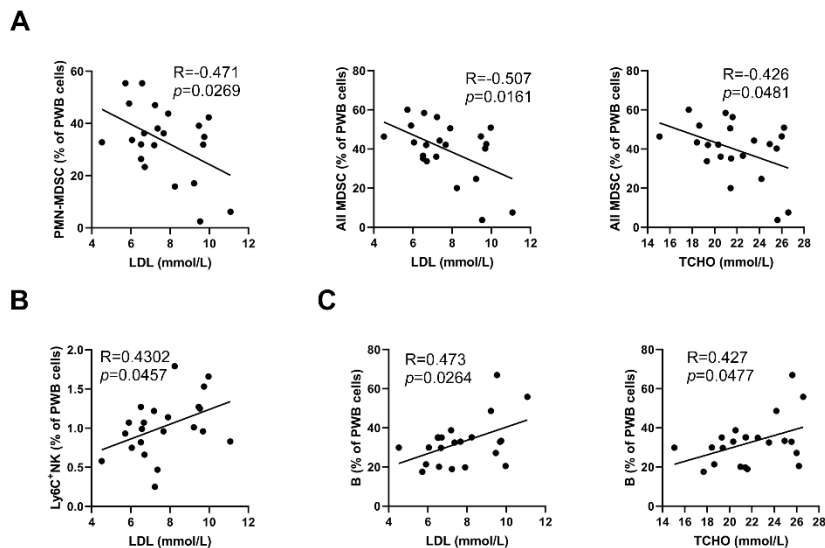

**Figure S4.** (A) Dot plots showing the Pearson correlation coefficients for relationships between the concentrations of LDL or TCHO in peripheral blood and frequencies of

PMN-MDSCs or All MDSCs. (B) Dot plots showing the Pearson correlation coefficients for relationships between the concentrations of LDL in peripheral blood and the frequencies of Ly6C<sup>+</sup>NK cells. (C) Dot plots (n=22) showing the Pearson correlation coefficients for relationships between the concentrations of LDL or TCHO in peripheral blood and the frequencies of peripheral blood B cells. Correlations were determined by a Pearson test.

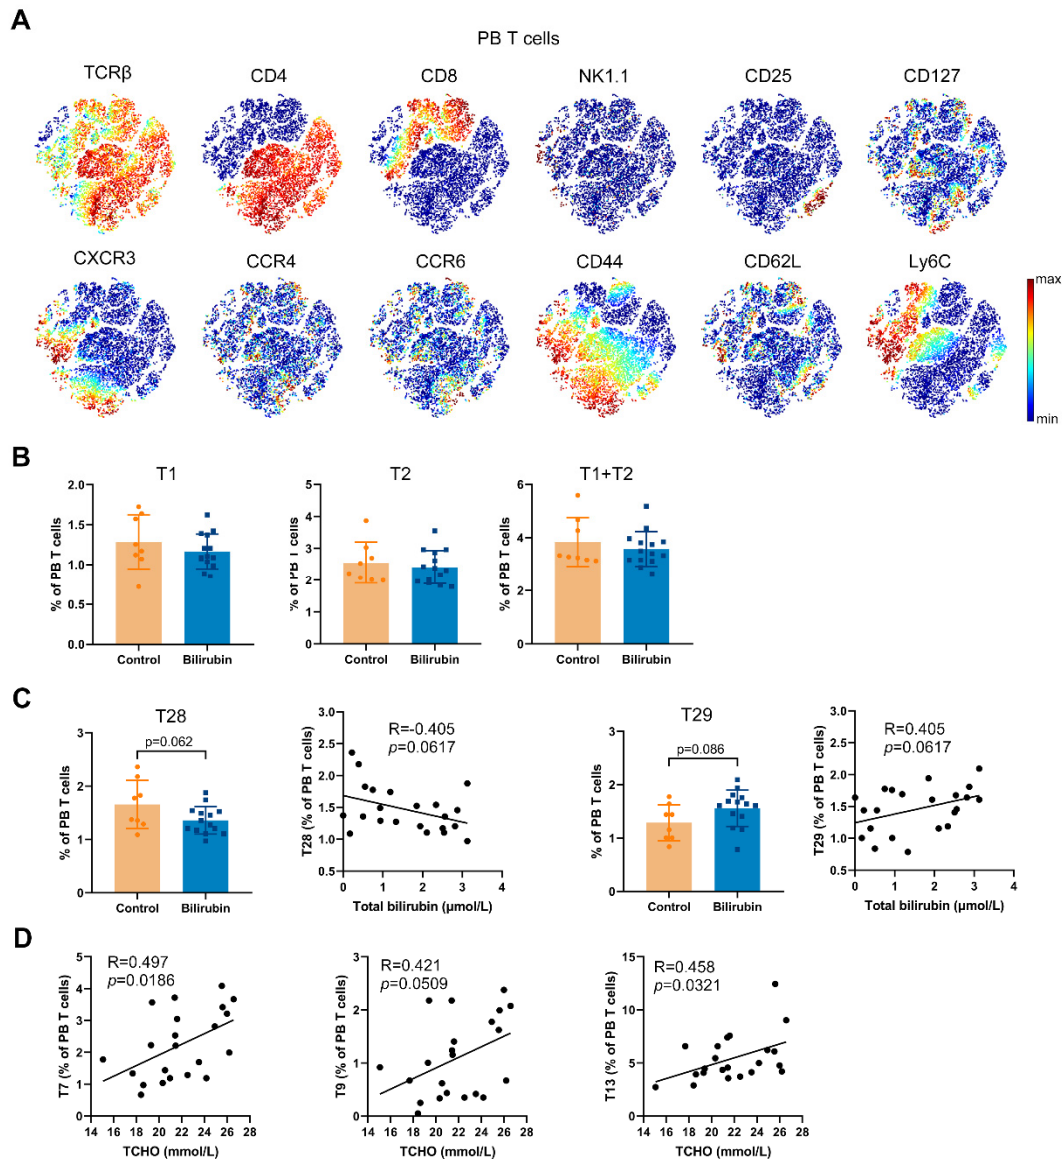

**Figure S5.** After determining the expression of 27 surface markers on the PWB cells using mass cytometry, the T cells expressing CD3 were gated and analyzed using viSNE. (A) viSNE was used to visualize the distribution of the peripheral blood T cells from both groups. Cells on the viSNE map were colored by normalized expression of

indicated surface markers. (B) Bar plots showing the frequencies of T1 or T2 in peripheral blood T cells obtained from ApoE<sup>-/-</sup> mice treated with or without bilirubin. (C) Bar plots showing the frequencies of T28 or T29 in peripheral blood T cells obtained from ApoE<sup>-/-</sup> mice treated with or without bilirubin (left panel). Dot plots showing the Pearson correlation coefficients for relationships between the concentrations of total bilirubin in peripheral blood and frequencies of T28 or T29 in peripheral blood T cells. (D) Dot plots (n=22) showing the Pearson correlation coefficients for relationships between the concentrations of TCHO in peripheral blood and the frequencies of T7, T9, T13 in peripheral blood T cells. Error bars represent mean  $\pm$  SD. n (control) =8, n (bilirubin) =14. Differences were determined by an unpaired t-test. Correlations were determined by a Pearson test.

**Supplementary Table**

Table S1. Mass cytometry antibody reagents

| <b>Label</b> | <b>Target</b>      | <b>Ab clone</b> | <b>Dilution</b> | <b>Source</b> |
|--------------|--------------------|-----------------|-----------------|---------------|
| 89Y          | CD45               | 30-F11          | 1:100           | Fluidigm      |
| 141Pr        | Ly6G               | 1A8             | 1:100           | Fluidigm      |
| 142Nd        | CD11c              | N418            | 1:100           | Fluidigm      |
| 143Nd        | TCR $\beta$        | H57-597         | 1:100           | Fluidigm      |
| 145Nd        | CD4                | RM4-5           | 1:100           | Fluidigm      |
| 146Nd        | F4/80              | BM8             | 1:100           | Fluidigm      |
| 148Nd        | CD11b (Mac-1)      | M1/70           | 1:100           | Fluidigm      |
| 149Sm        | CD19               | 6D5             | 1:100           | Fluidigm      |
| 150Nd        | Ly6C               | HK1.4           | 1:100           | Fluidigm      |
| 151Eu        | CD25 (IL-2R)       | 3C7             | 1:100           | Fluidigm      |
| 152Sm        | CD3e               | 145-2C11        | 1:100           | Fluidigm      |
| 156Gd        | CD196 (CCR6)       | 29-2L17         | 1:100           | Fluidigm      |
| 160Gd        | CD62L (L-selectin) | MEL-14          | 1:100           | Fluidigm      |
| 162Dy        | CD44               | IM7             | 1:100           | Fluidigm      |
| 165Ho        | CD161 (NK1.1)      | PK136           | 1:100           | Fluidigm      |
| 168Er        | CD8a               | 53-6.7          | 1:100           | Fluidigm      |
| 169Tm        | CD206 (MMR)        | C068C2          | 1:100           | Fluidigm      |
| 170Er        | CD49b              | HMa2            | 1:100           | Fluidigm      |
| 171Yb        | CD80 (B7-1)        | 16-10A1         | 1:100           | Fluidigm      |
| 172Yb        | CD86               | GL1             | 1:100           | Fluidigm      |
| 174Yb        | CD127 (IL-7Ra)     | A7R34           | 1:100           | Fluidigm      |
| 176Yb        | CD45R (B220)       | RA3-6B2         | 1:100           | Fluidigm      |
| 163Dy        | CD183(CXCR3)       | CXCR3-173       | 1:100           | BioLegend     |
| 175Lu        | CCR4               | 2G12            | 1:100           | BioLegend     |
| 159Tb        | CD103              | 2E7             | 1:100           | BioLegend     |
| 114Cd        | IA/IE(MHC II)      | M5/114.15.2     | 1:100           | BioLegend     |
